# Supplementary material for: Deletion of pancreas-specific miR-216a reduces beta-cell mass and inhibits pancreatic cancer progression in mice
Source: PubMed Central journal article supplement — Cell Rep Med. 2021 Nov 11;2(11):100434. doi: 10.1016/j.xcrm.2021.100434 (PMC8606901; doi:10.1016/j.xcrm.2021.100434), 2021-11-11
Supplement: mmc1.pdf [file mmc1.pdf]

**Supplemental information**

**Deletion of pancreas-specific miR-216a  
reduces beta-cell mass and inhibits  
pancreatic cancer progression in mice**

**Suheda Erener, Cara E. Ellis, Adam Ramzy, Maria M. Glavas, Shannon O'Dwyer, Sandra Pereira, Tom Wang, Janice Pang, Jennifer E. Bruin, Michael J. Riedel, Robert K. Baker, Travis D. Webber, Marina Lesina, Matthias Blüher, Hana Algül, Janel L. Kopp, Stephan Herzig, and Timothy J. Kieffer**

**Figure S1**

**A**

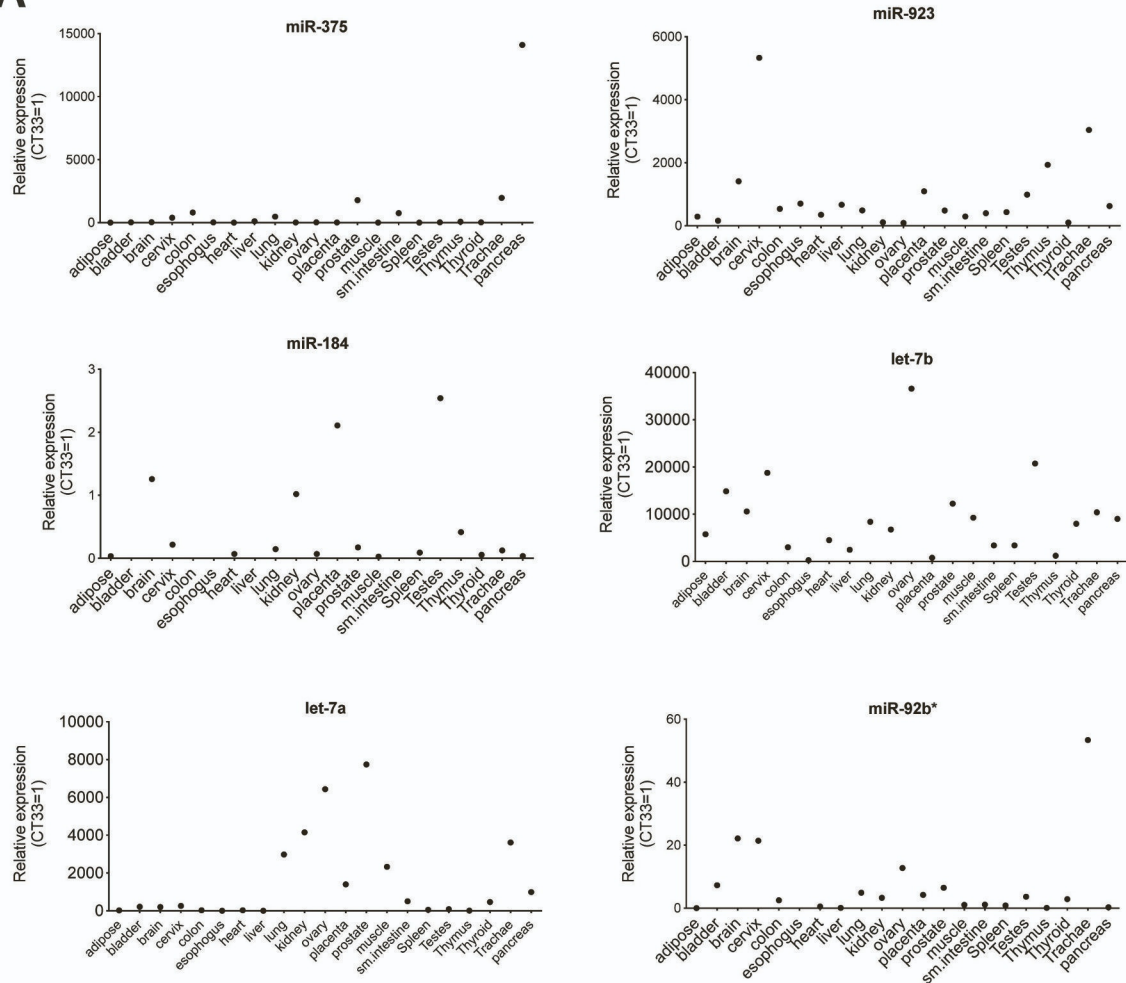

**B**

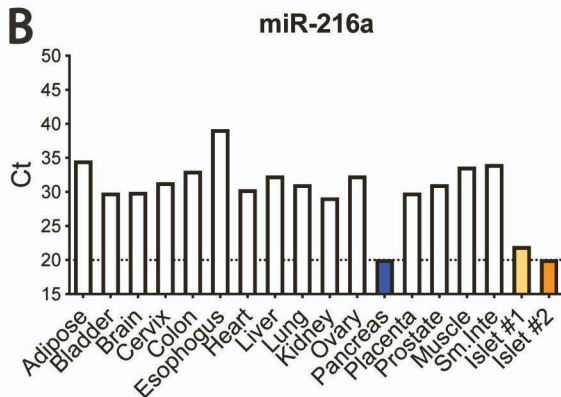

**C**

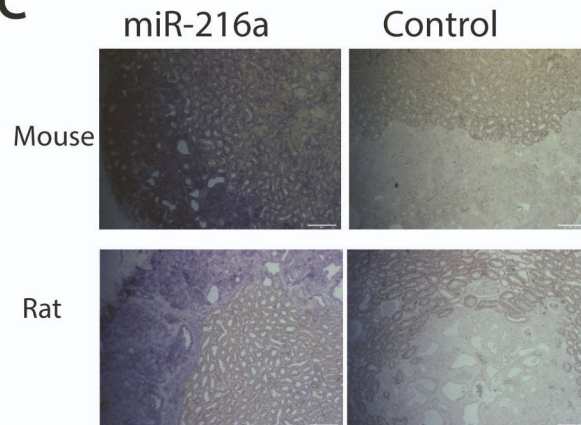

**Figure S1. miR-216a is expressed in the endocrine grafts.** (A) Expression of the indicated miRNAs in various human tissues. Equal amounts of RNA from human tissues (each a pool of 3 tissue donors) was reverse-transcribed and expression of indicated miRNAs was determined by qRT-PCR. Threshold cycle 33 (Ct = 33) was arbitrarily set as 1. (B) qRT-PCR analysis from human tissues as in Figure 1B with added human islets. Ct values are shown. (C) miR-216a is expressed in pancreatic tissue differentiated from hESCs. Representative in situ hybridization images of differentiated hESC-derived grafts at 22 weeks post implant in a mouse and a rat. Grafts harvested from mice and rats were probed with DIG-labeled miR-216a and scrambled miRNA control probes. Scale bars = 100  $\mu$ m. Related to Figure 1.

**Figure S2**

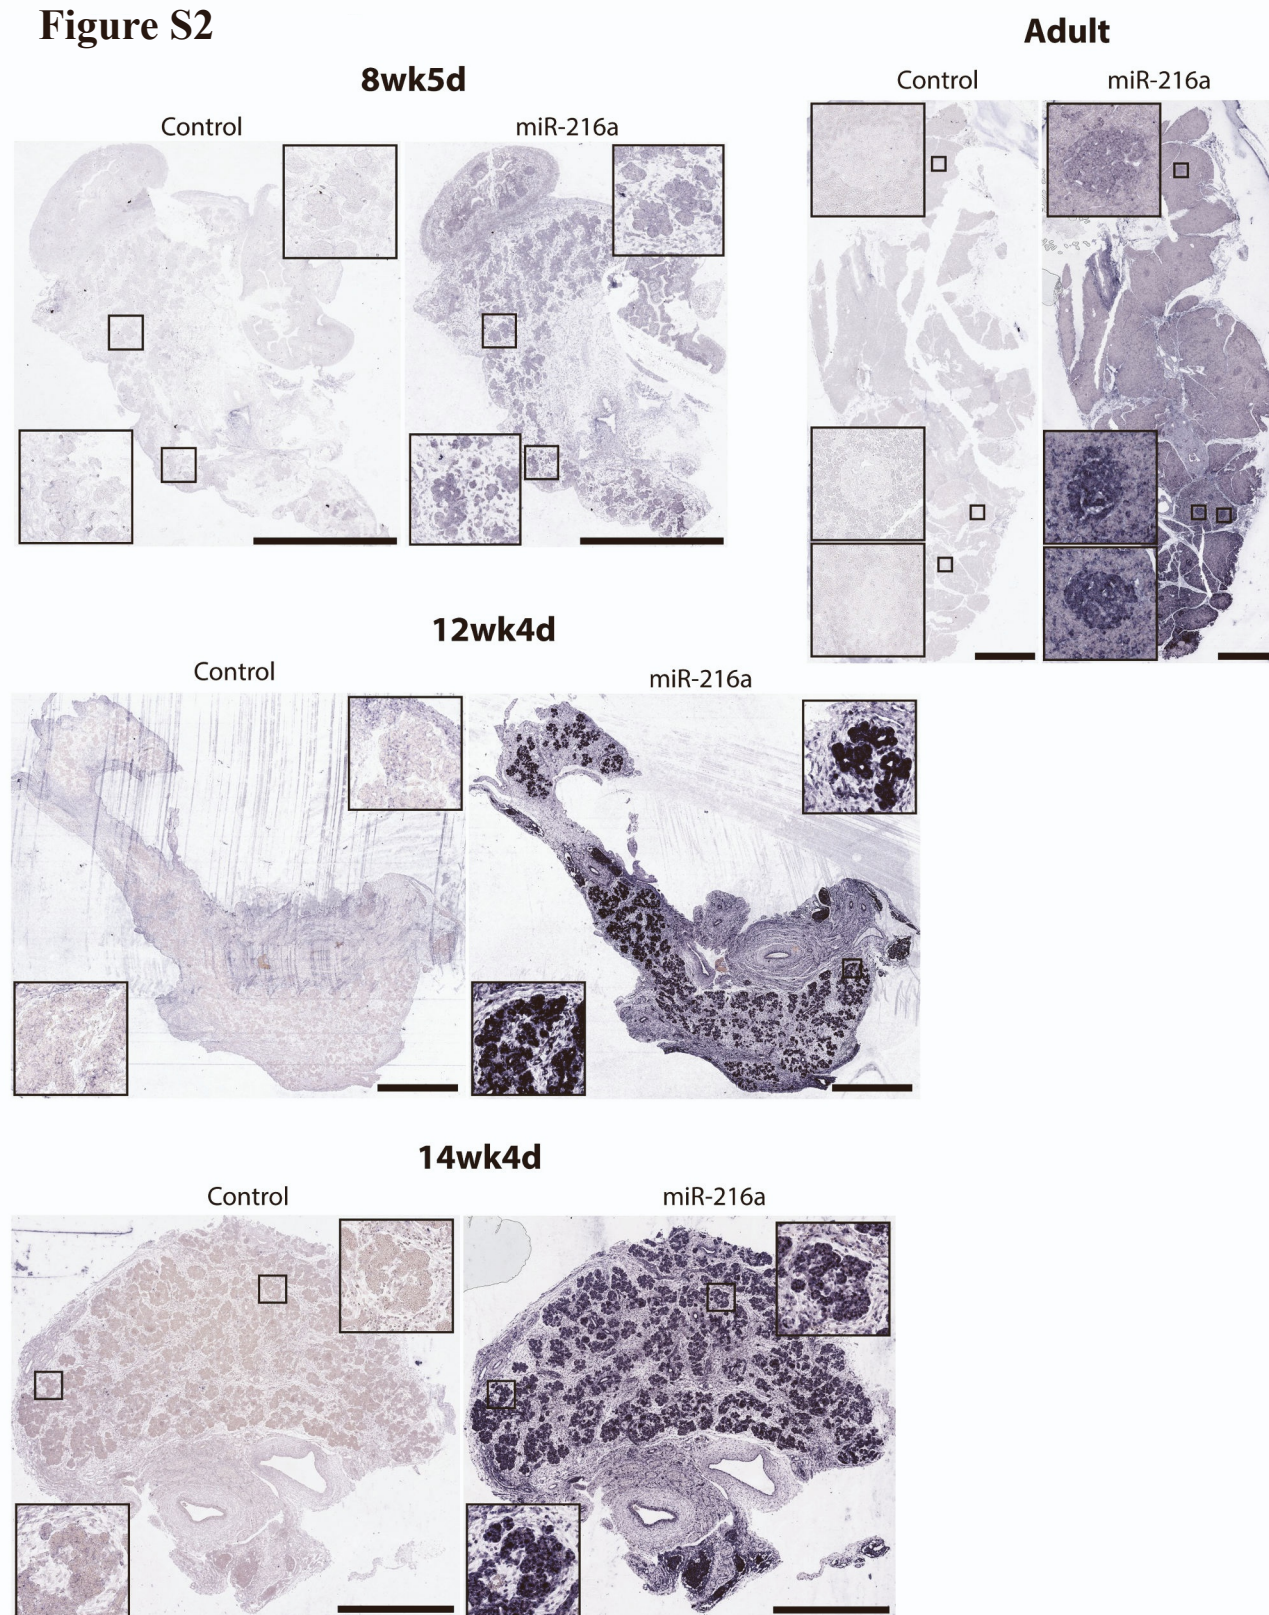

**Figure S2. miR-216a expression in human fetal pancreas.** Whole fetal pancreatic sections are shown. Adult human pancreata were probed with DIG-labeled miR-216a and scrambled control miRNA probes at the indicated gestational weeks. Purple color indicates presence of miRNA expression. Insets are enlarged 20x. Scale bar = 1 mm. Related to Figure 1.

**Figure S3**

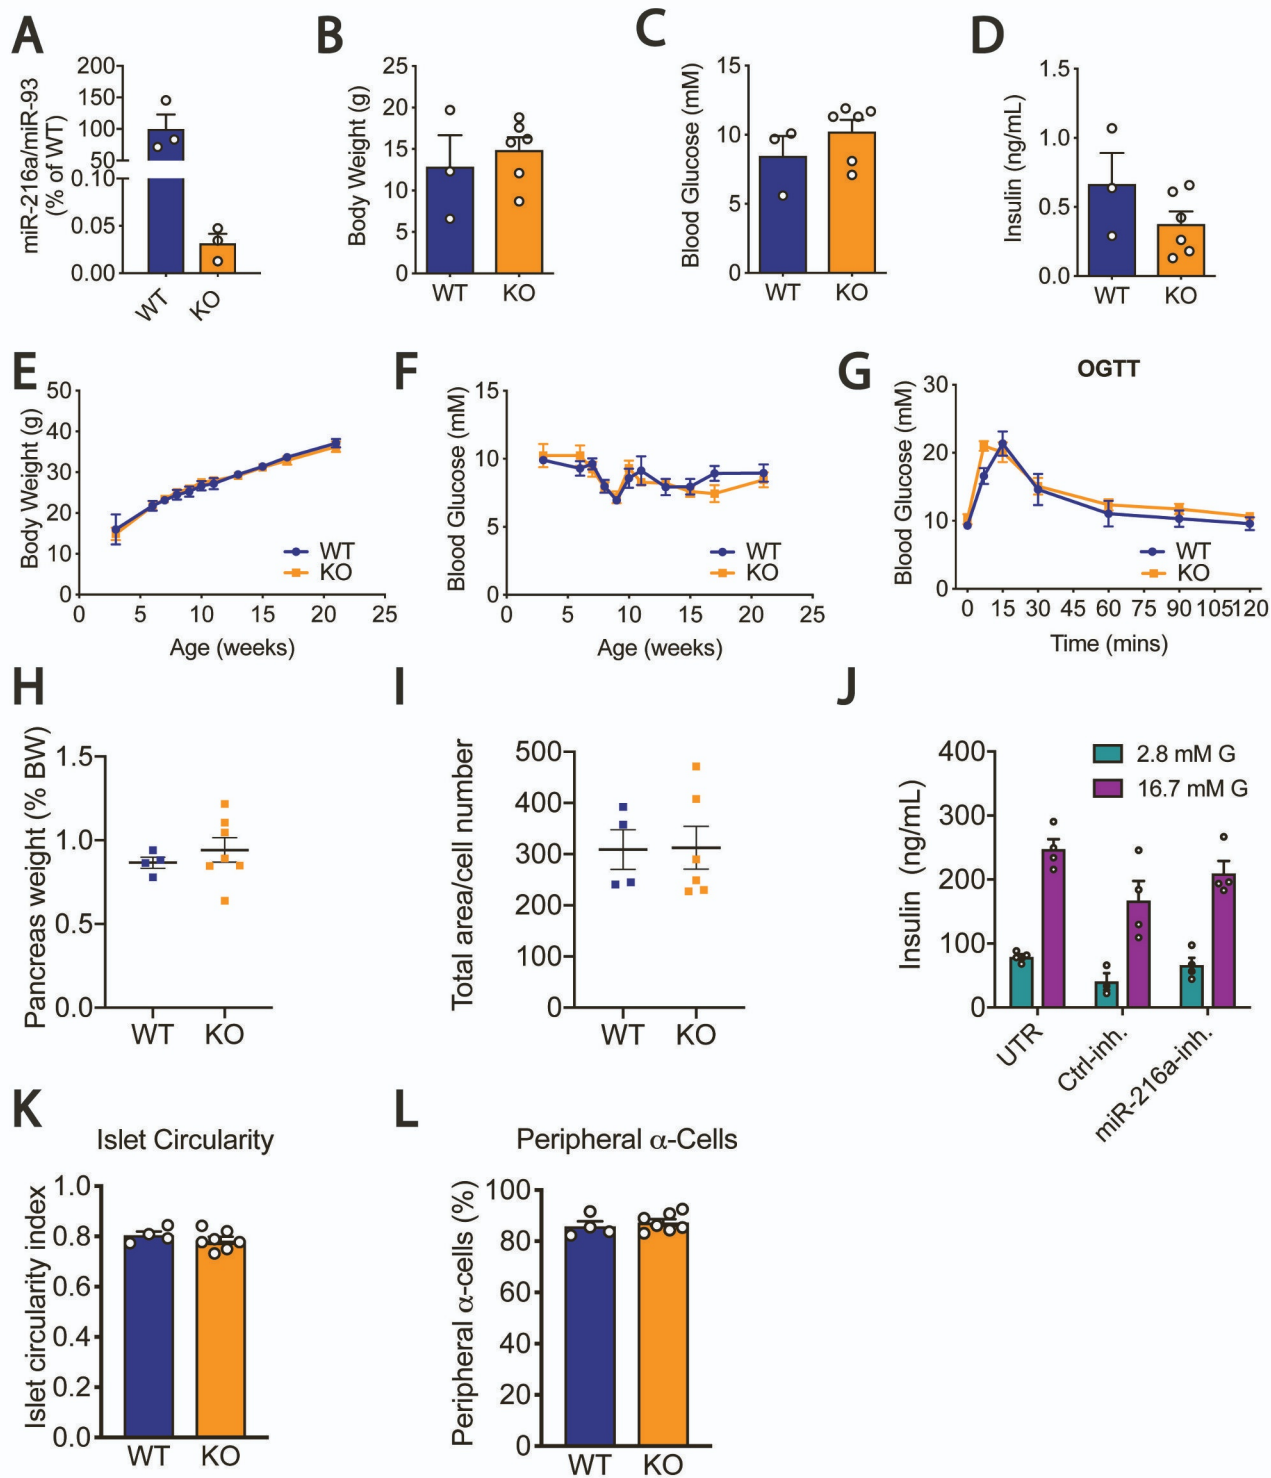

**Figure S3. miR-216a KO mice do not display alterations in glucose homeostasis.** (A) Islets from 10-week old male WT and miR-216a KO mice were isolated and miRNA expression was quantified with qRT-PCR.  $n = 3$  mice. (B-D) Body weight (B), fasting blood glucose (C), and insulin measurements (D) from 3-4 week old male mice.  $n = 3-6$  mice. (E-G) WT and miR-216a KO male mice on regular chow diet were monitored for body weight (E) and blood glucose (F) for 21 weeks.  $n = 4-7$  mice. Oral glucose tolerance test (OGTT) performed in 10-week old male mice, with measurement of blood glucose levels (G). (H) Pancreata from 21-week old WT and miR-216a KO mice were weighed and normalized to body weight. (I) Pancreatic cell size was assessed by analyzing dapi staining from the pancreata of 21-week old male mice. (J) INS-1E cells were transfected with the indicated inhibitors and 48 hours post-transfection cells were incubated serially with 2.8 mM and 16.7 mM glucose containing media. Insulin secretion was assessed by insulin ELISA.  $n=4$  mice. (K) Pancreata from adult male mice ( $n=4-7$  mice) were immunostained for synaptophysin, insulin and glucagon, and islet circularity, peripheral  $\alpha$ -cell percentage were calculated. Individual data points are shown in (A-D, H-L). Data represent mean  $\pm$  SEM. Related to Figure 2.

**Figure S4**

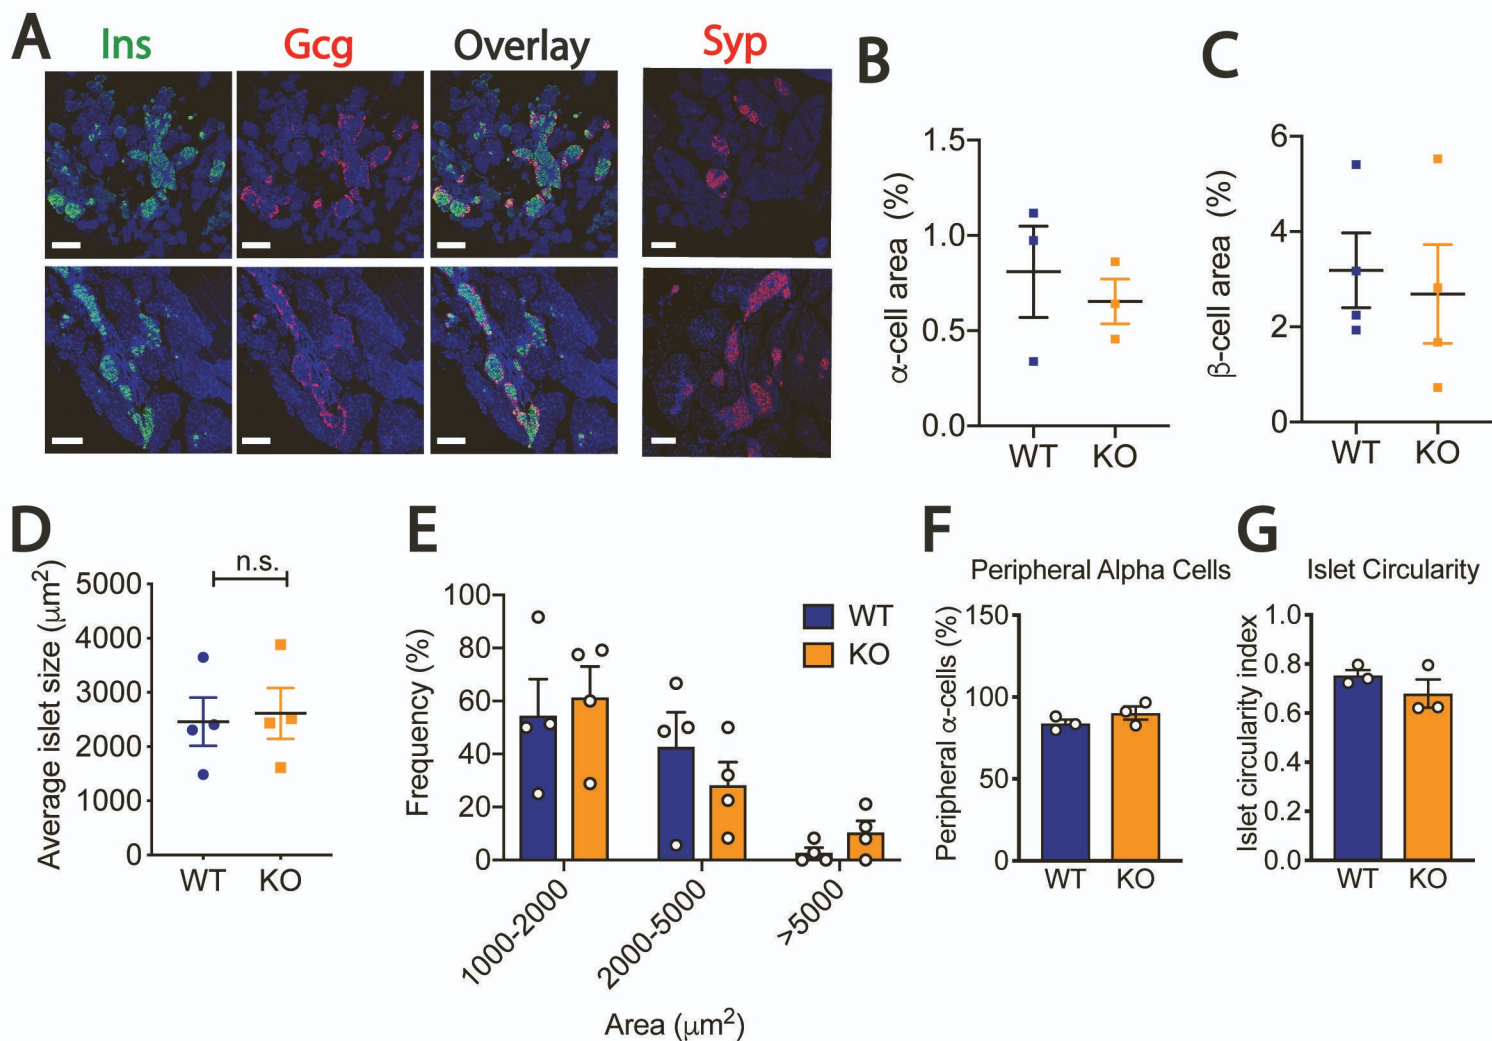

**Figure S4.  $\beta$ -cell mass and islet size mass is unchanged in one-day old miR-216a KO mice.** (A) Pancreata from one-day old male neonatal mice were immunostained for synaptophysin, insulin and glucagon. Nuclei were identified with dapi (blue). Scale bar = 100  $\mu\text{m}$ . (B)  $\alpha$ -cell area, (C)  $\beta$ -cell area, (D) average islet size, and (E) islet size distribution, (F) peripheral  $\alpha$ -cells (G) islet circularity were calculated. Individual data points are shown. n=3-4 mice. Data represent mean  $\pm$  SEM. A two-tailed Student's t-test was performed to assess significance. n.s. not significant. Related to Figure 2.

**Figure S5**

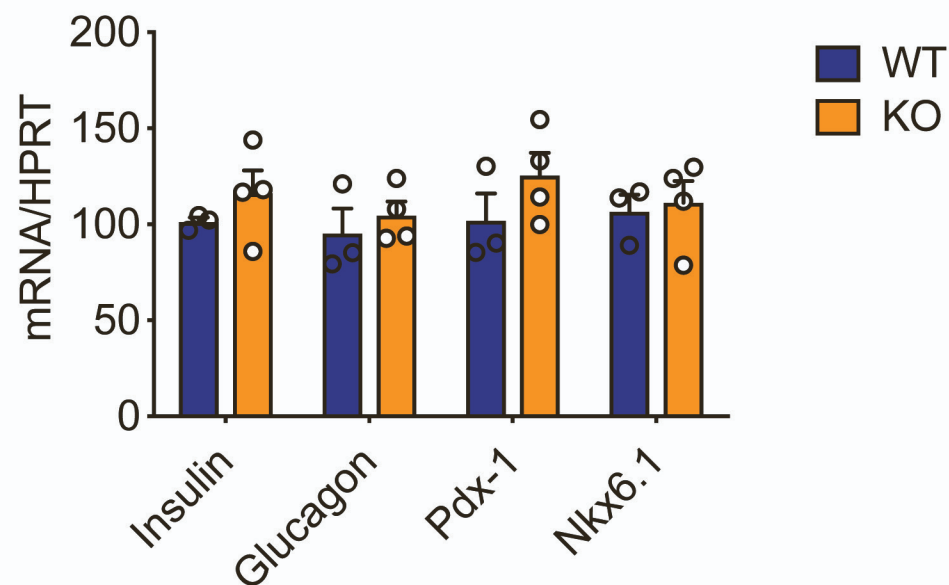

**Figure S5. Gene expression analysis using islets isolated from 10-week old male WT and miR-216a KO mice.** RNA was isolated, reverse-transcribed and expression of the indicated genes was determined by qRT-PCR. WT levels arbitrarily set as 100. n = 3-4 mice. Individual data points are shown. Data represent mean  $\pm$  SEM. Related to Figure 3.

Figure S6

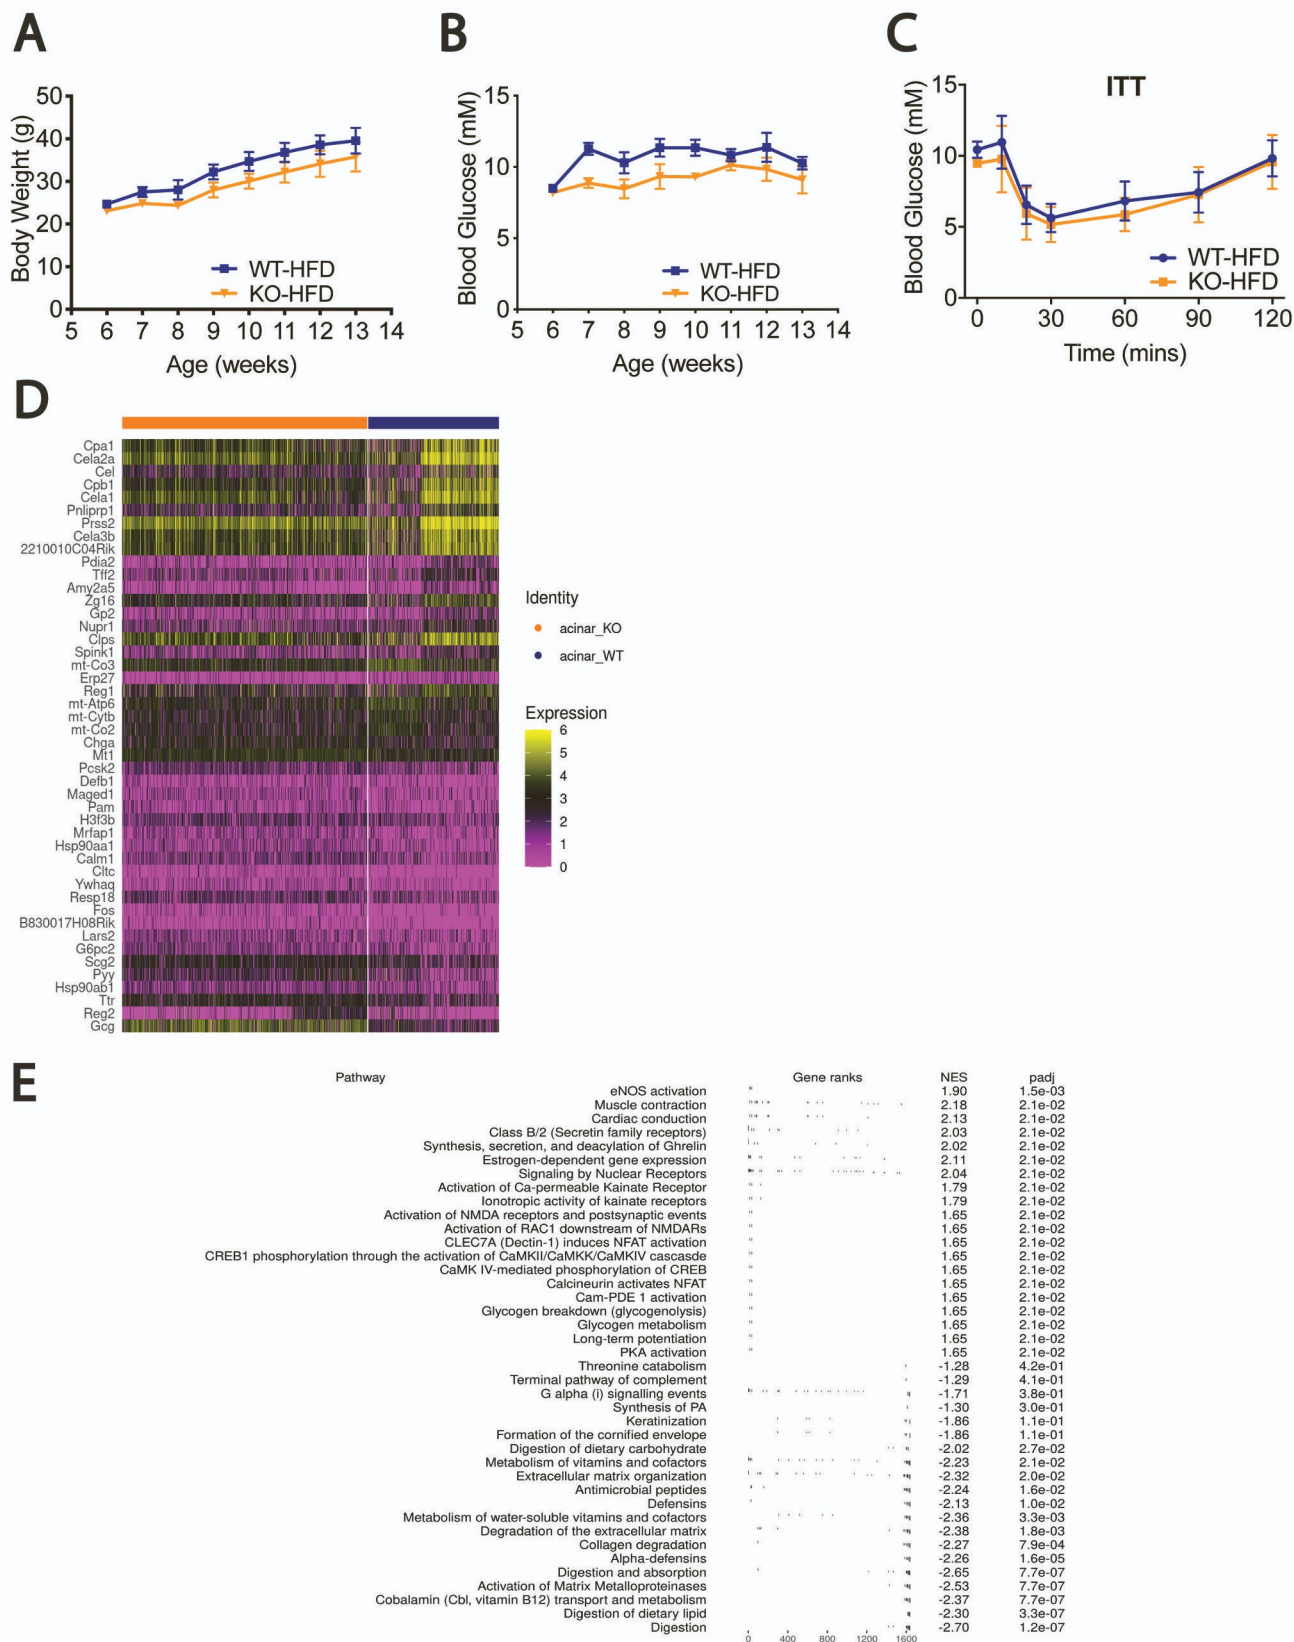

**Figure S6. Insulin tolerance test during high-fat-diet (HFD) feeding.** WT and miR-216a KO male mice were fed with a 60% HFD for 8-weeks and weekly (A) body weight (B) and fasted blood glucose levels were measured. (C) Blood glucose levels during insulin tolerance tests (ITT) performed 8 weeks post HFD. Data represent mean  $\pm$  SEM. (D) Single-cell RNA-seq was carried out on mouse pancreatic islets. A heatmap showing normalized gene expression for the statistically significantly up- or downregulated genes within the acinar cell cluster comparing between genotypes, further analyzed in (E) showing gene set enrichment analysis on all differentially expressed genes. Related to Figure 4.

Figure S7

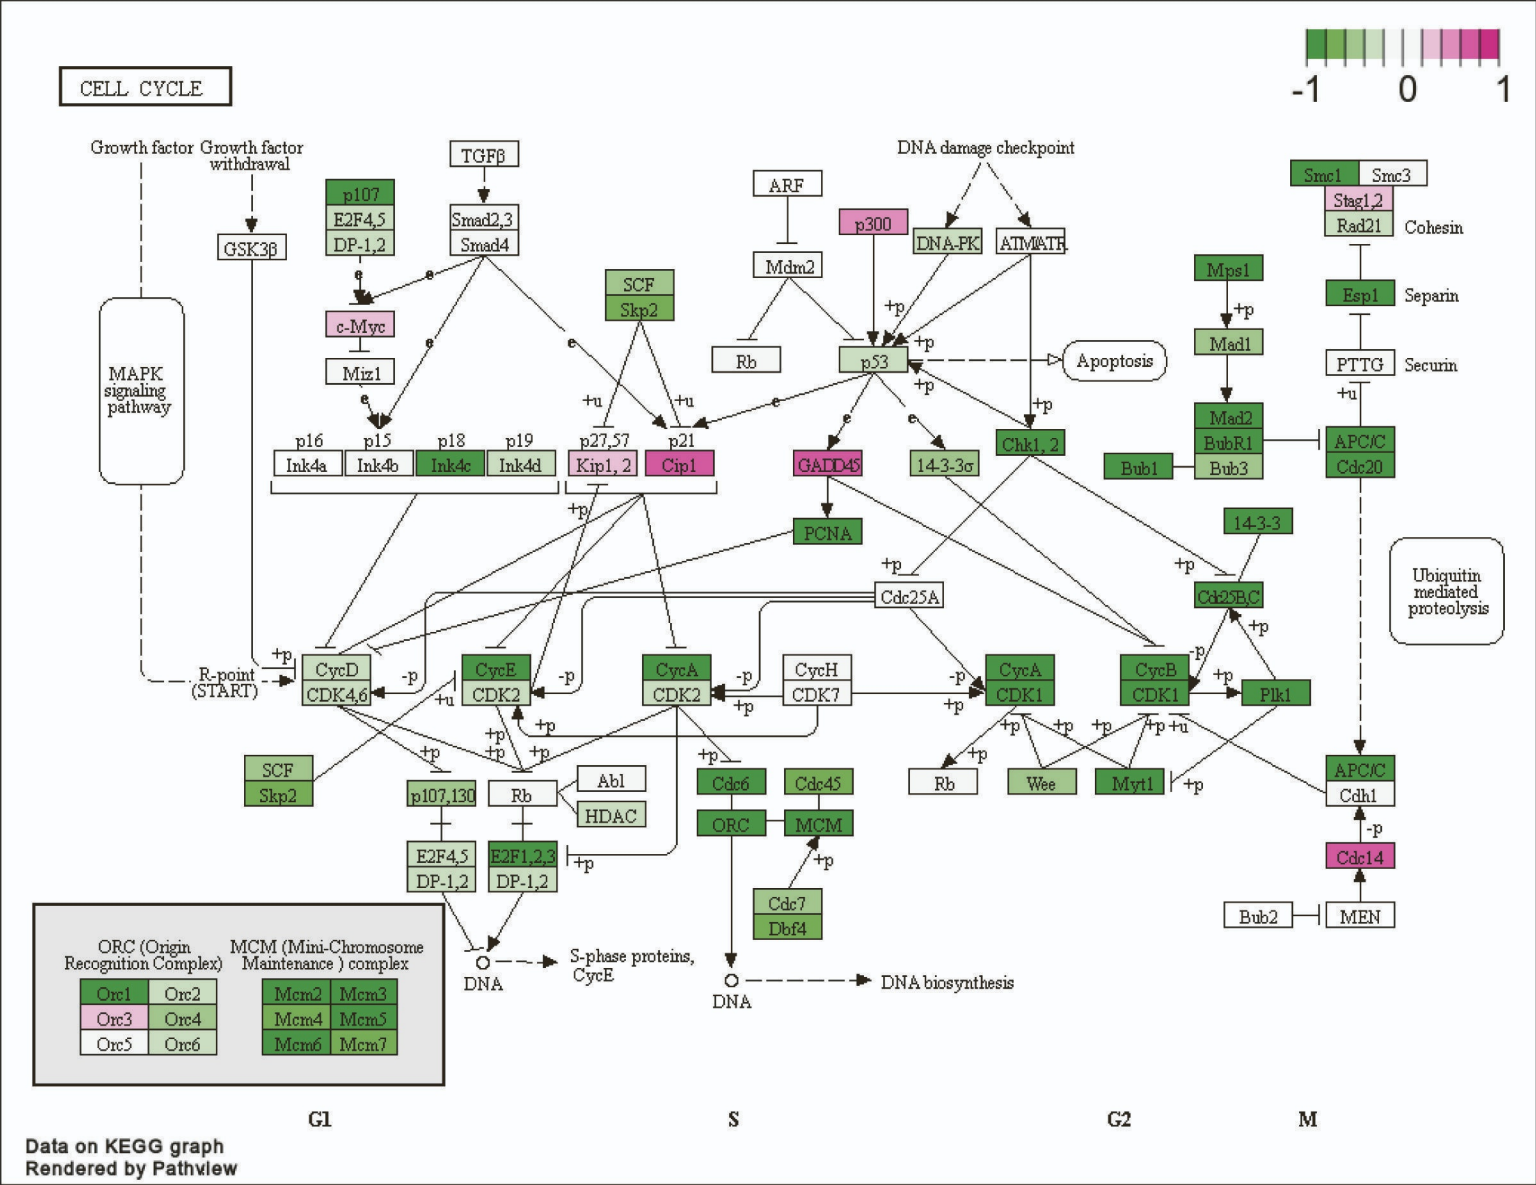

**Figure S7. A cell cycle pathway map.** Genes significantly upregulated in miR-216a KO mice compared to WT mice are shown in purple, and genes significantly downregulated in the KO mice compared to WT mice are shown in green. Cell cycle is a significantly enriched GO “Biological Process” and KEGG term, with statistical significance defined as a q value < 0.1 (therefore allowing a 10% FDR). Related to Figure 5.

**Table S1**

| Mouse # | Genotype | Body Weight (g) | Blood Glucose (mM) | Cell Count (cells/ $\mu$ L) | Viability (%) |
|---------|----------|-----------------|--------------------|-----------------------------|---------------|
| 1       | KO       | 39.3            | 12.7               | 627                         | 84            |
| 2       | WT       | 37.3            | 11.8               | 636                         | 80            |
| 3       | KO       | 39.1            | 11.4               | 473                         | 75            |
| 4       | WT       | 42.5            | 14.5               | 704                         | 75            |

**Table S1: Characteristics of Donors and Cell Preparations for scRNAseq.** Related to Figure 4.

**Table S2**

| Cell Type   | Canonical Gene(s)    |
|-------------|----------------------|
| Alpha       | Gcg                  |
| Beta        | Ins1, Ins2, and Iapp |
| Delta       | Sst                  |
| Epsilon     | Ghrl                 |
| PPY         | Ppy                  |
| Ductal      | Krt19                |
| Acinar      | Cpa1                 |
| Endothelial | Pecam1               |
| Macrophage  | Cd68                 |
| Stellate    | Rgs5 or Pdgfrb       |

**Table S2: Canonical Genes Used to Identify Cell Clusters.** Related to Figure 4.

**Table S6**

| Subject # | Control |        | T2D |        | CP  |        | PDAC |        | mPDAC |        |
|-----------|---------|--------|-----|--------|-----|--------|------|--------|-------|--------|
|           | Age     | Gender | Age | Gender | Age | Gender | Age  | Gender | Age   | Gender |
| 1         | 66      | female | 51  | female | 40  | female | 56   | male   | 67    | male   |
| 2         | 64      | female | 73  | female | 86  | male   | 54   | male   | 73    | female |
| 3         | 70      | female | 44  | male   | 49  | male   | 52   | female | 69    | male   |
| 4         | 75      | female | 20  | female | 29  | female | 47   | female | 51    | male   |
| 5         | 57      | male   | 35  | male   | 54  | male   | 44   | male   | 76    | female |
| 6         | 41      | female | 46  | female | 61  | female | 52   | female | 58    | male   |
| 7         | 51      | male   | 34  | female | 78  | female | 70   | male   | 71    | male   |
| 8         | 66      | female | 42  | male   | 55  | female | 45   | female | 64    | male   |
| 9         | 68      | female | 31  | female | 51  | male   | 71   | female | 70    | female |
| 10        | 57      | female |     |        |     |        | 58   | male   | 67    | female |
| 11        | 21      | female |     |        |     |        | 63   | male   | 76    | male   |
| 12        | 65      | female |     |        |     |        | 74   | male   | 59    | male   |
| 13        | 64      | female |     |        |     |        | 76   | female | 64    | male   |
| 14        | 28      | male   |     |        |     |        | 62   | male   | 71    | male   |
| 15        | 36      | female |     |        |     |        | 68   | female | 74    | female |
| 16        | 48      | female |     |        |     |        | 65   | male   | 63    | male   |
| 17        | 44      | female |     |        |     |        | 71   | male   | 78    | male   |
| 18        | 43      | male   |     |        |     |        | 74   | female | 65    | male   |
| 19        | 30      | female |     |        |     |        | 69   | male   | 67    | female |
| 20        | 46      | male   |     |        |     |        | 58   | male   |       |        |

**Table S6: Age and gender of the donors.** Related to Figure 6.
